# Supplementary material for: Global Impairment of Immediate-Early Genes Expression in Rett Syndrome Models and Patients Linked to Myelination Defects
Source: MDPI journal article supplement (doi:10.3390/ijms24021453), 2023-01-11
Supplement: s1 [file s1]

## Supplementary Materials:

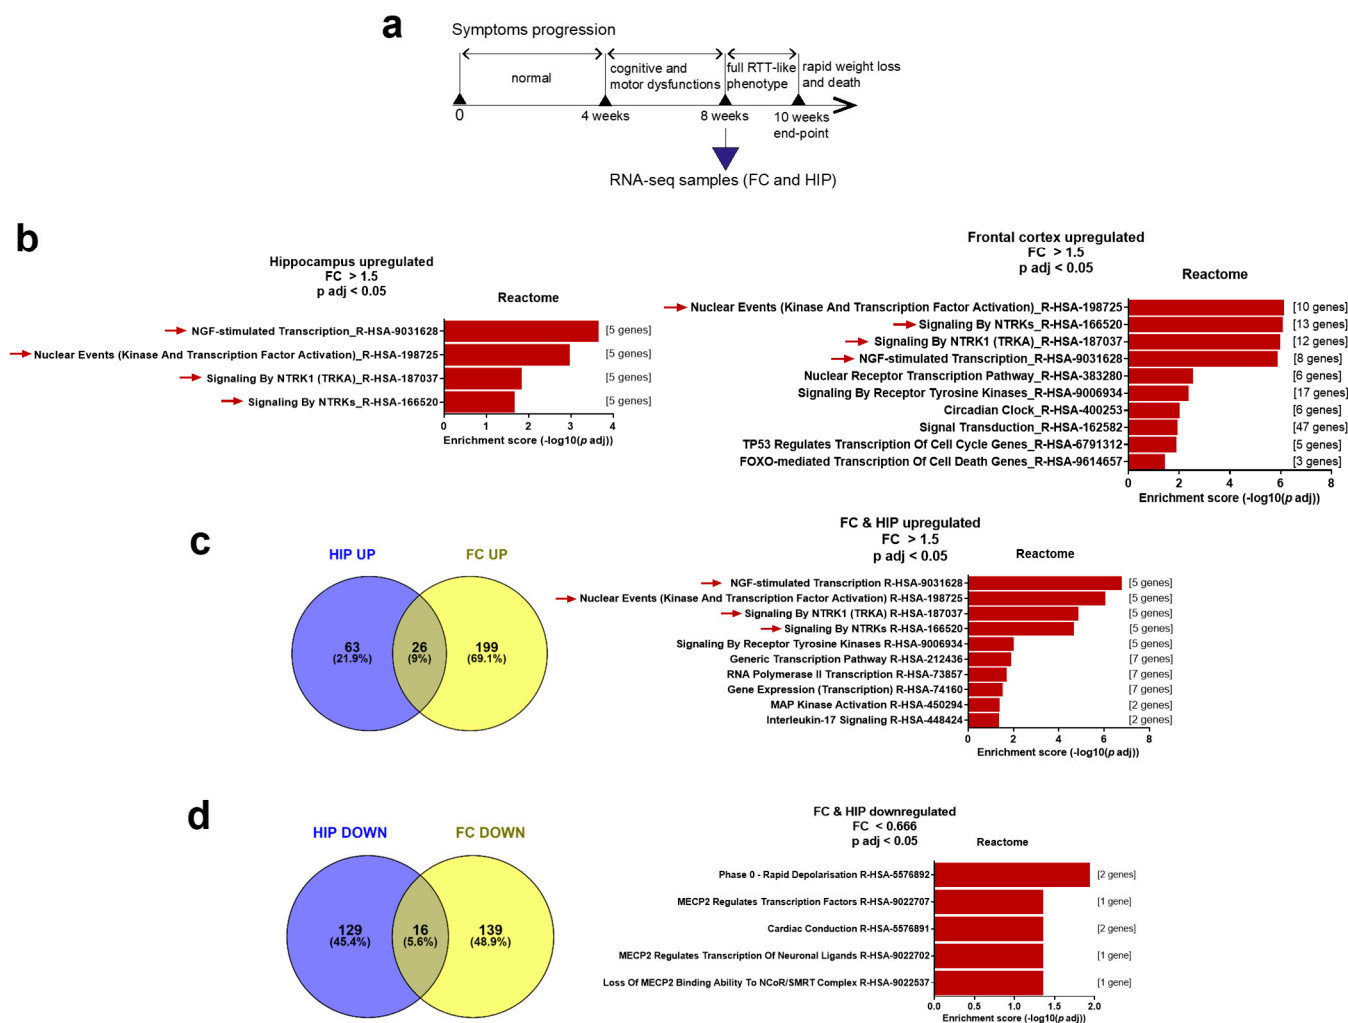

**Figure S1.** Differentially expressed genes (DEG) analysis in the *Mecp2*-KO(*Mecp2*<sup>y/-</sup>) mouse model by RNA-seq. (a) Timeline of symptoms progression in the Rett mice. Samples for RNA-seq analysis were taken from the hippocampus and frontal cortex at 8 weeks, when the RTT-like phenotype is fully manifested. (b) Enrichment analysis (Reactome) of significantly upregulated genes in the hippocampus or frontal cortex (FC>1.5, adj p adj<0.05) of 8-week mice. All five significantly enriched categories in the hippocampus are represented by the following genes: *Egr1*, *Egr2*, *Arc*, *Fosb*, *Fos*. (c) Venn's diagram analysis shows common upregulated genes in the hippocampus and frontal cortex, together with their corresponding enriched categories. The 26 common genes are: *Mybpc1*, *Runx2*, *Etnppl*, *Btg2*, *Ciart*, *Fam46a*, *Egr1*, *Cdk6*, *Pdlim1*, *Zfhx3*, *Dusp1*, *Cdr1*, *Gm42730*, *Fosb*, *Bmper*, *Dusp5*, *Gm28036*, *Irak1*, *Nr4a1*, *Npas4*, *Egr2*, *Gm2260*, *Junb*, *Fos*, *Xlr3b*, *Arc*. (d) As in (c), but with downregulated genes. The 16 genes are: *Mecp2*, *Capn11*, *Epn3*, *AW551984*, *Grp*, *Gm6206*, *Scn7a*, *Fgf11*, *Iigp1*, *Igf1p2*, *Kirrel2*, *Htr1a*, *Gbp3*, *Pdyn*, *Cplx3*, *Tmem91*.

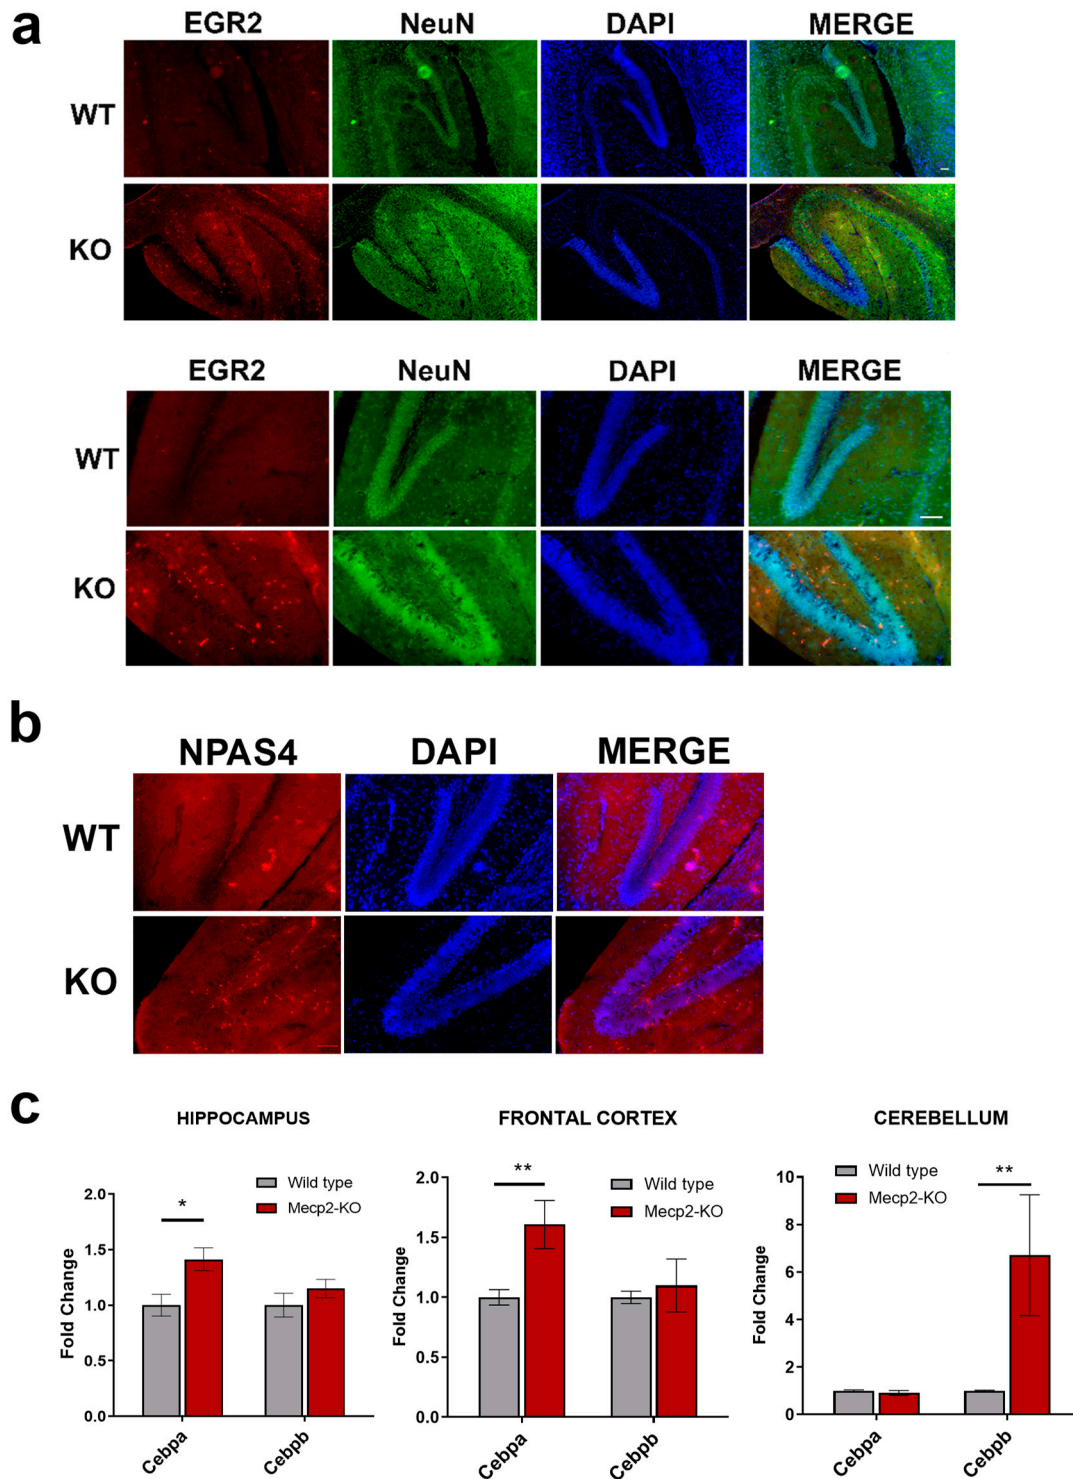

**Figure S2. (a)** Representative immunostaining of EGR2 protein (red) and NeuN as a neuronal marker (green) in the hippocampal regions of WT or *Mecp2*-KO 8-week mice, counterstained with DAPI (blue). Images were taken with 10x (above) or 20x (below) objectives. Scale bars represent 200  $\mu$ m. **(b)** Representative immunostaining of NPAS4 protein (red) in the hippocampal regions of WT or *Mecp2*-KO 8-week mice, counterstained with DAPI (blue). Scale bar represents 160  $\mu$ m. All images were processed with ImageJ Fiji version 1.50g. **(c)** Analysis of *Cebpa* and *Cebpb* gene expression in the indicated regions of WT or *Mecp2*-KO 8-week mice by RT-qPCR (n = 3 animals per condition, graphs represent means  $\pm$  SEM, \* p < 0.05 in Student's t-tests).

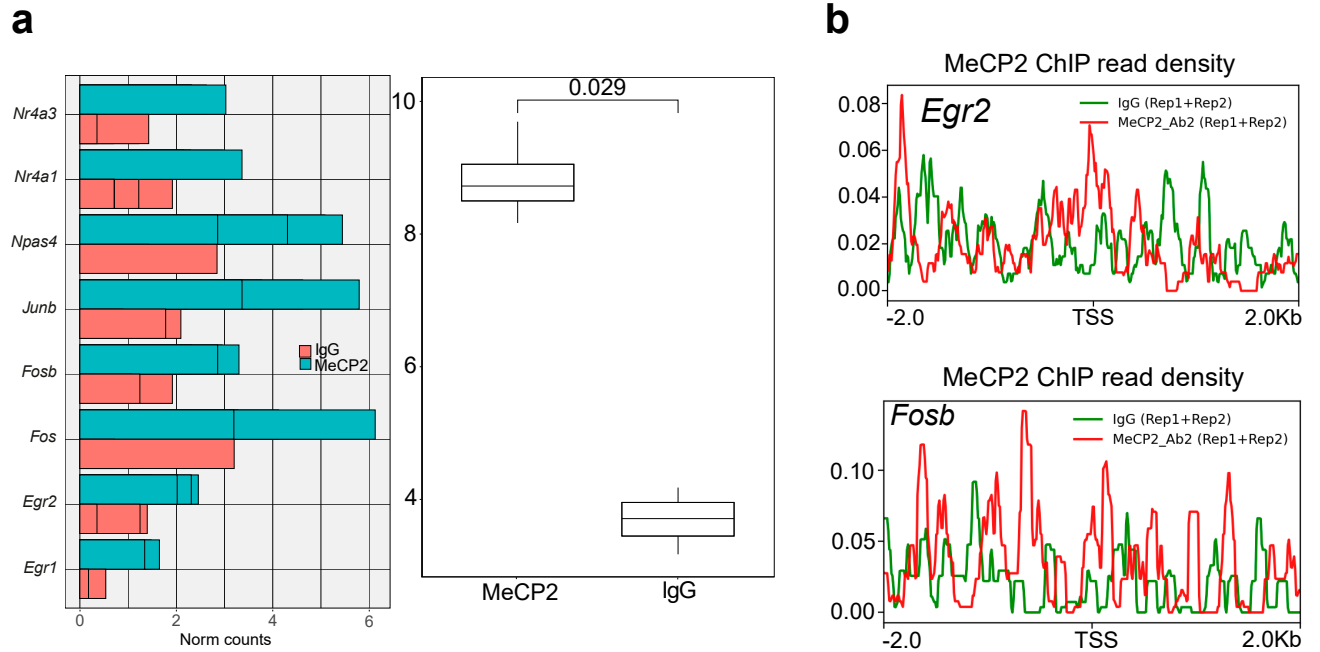

**Figure S3.** MeCP2 is enriched on IEGs promoters in public datasets. (a) Distribution of normalized ChIP-seq counts on the indicated IEGs promoters. Counts were normalized to counts per million (cpm) and a Wicoxon-ranked test was conducted for comparison between the control and the MeCP2 group, showing a significant difference. (b) As examples, the MeCP2 ChIP-seq read distribution profile encompassing the transcription start site (TSS) is shown for *Egr2* and *Fosb* genes.

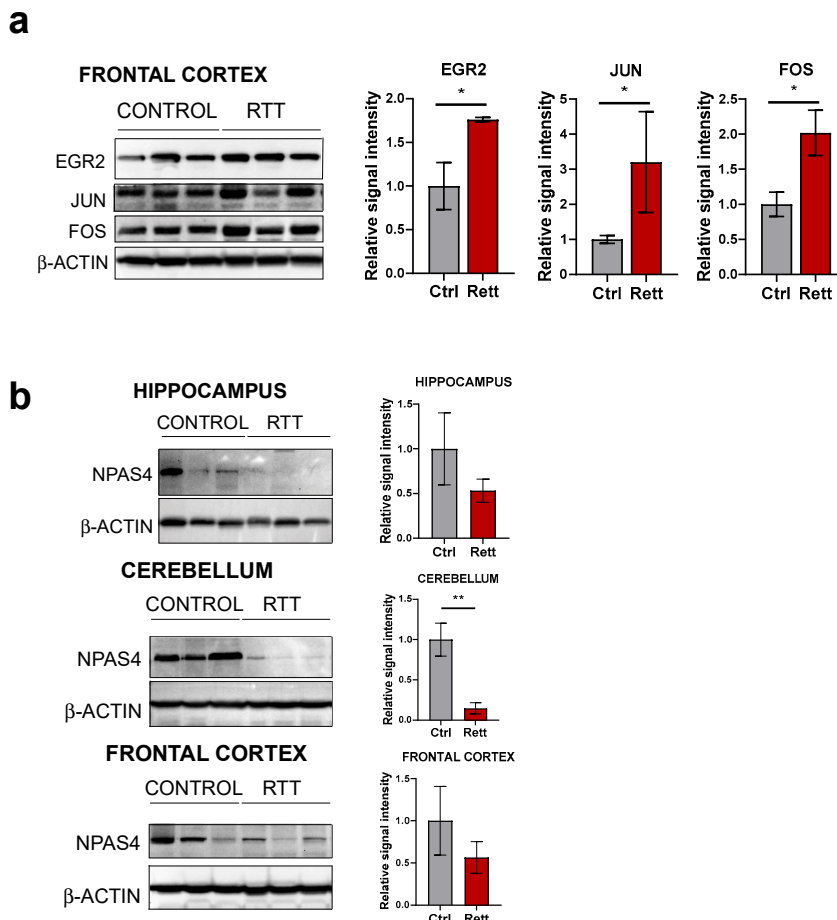

**Figure S4.** (a) Western Blot analysis of EGR2, JUN and FOS protein levels in the frontal cortex of post-mortem RTT patients' samples. Actin was used as loading control. Graphs on the right indicate the quantitation of band intensity (mean values  $\pm$  SEM of  $n = 3$  subjects per condition). Student's  $t$ -tests were used (\*  $p < 0.05$ ). (b) Western Blot analysis of NPAS4 protein levels in the indicated brain regions of post-mortem RTT patients' samples. Graphs on the right indicate the quantitation of band intensity (mean values  $\pm$  SEM of  $n = 3$  subjects per condition). Student's  $t$ -tests were used.

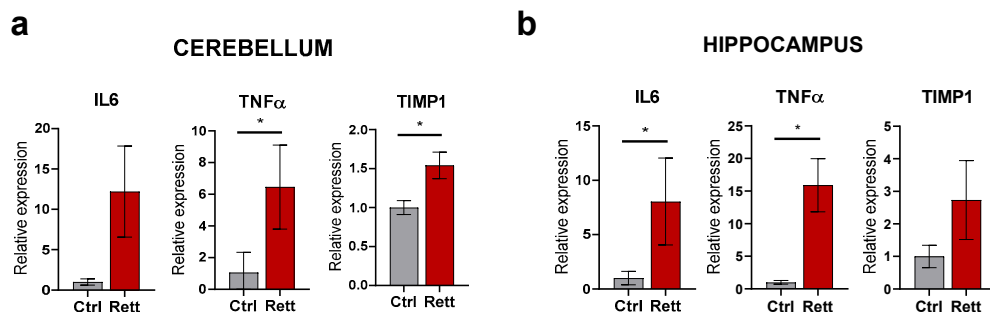

**Figure S5.** Expression levels of pro-inflammatory cytokines in RTT patients. (a, b) *IL6*, *TNF $\alpha$* , and *TIMP1* mRNA levels were measured by RT-qPCR in the cerebellum (a) or hippocampus (b) of post-mortem RTT patients or healthy control samples ( $n = 3$  subjects per condition, graphs represent means  $\pm$  SEM, \*  $p < 0.05$  in Student's  $t$ -tests).
